# Supplementary material for: Green synthesis of MoS2 nanoflowers for efficient degradation of methylene blue and crystal violet dyes under natural sun light conditions
Source: Royal Society of Chemistry journal article supplement (doi:10.1039/c8nj01731j), 2018-01-01
Supplement: c8nj01731j1.pdf [file c8nj01731j1.pdf]

*Supporting Information For*

# **Green Synthesis of MoS<sub>2</sub> Nanoflowers for Efficient Degradation of Methylene Blue and Crystal Violet Dyes under Natural Sun Light Conditions**

*Hari Krishna Sadhanala,<sup>†,§</sup> Subrata Senapati,<sup>†</sup> Harika Krishna Villa,<sup>‡</sup> Karuna Kar Nanda,<sup>\*†</sup>  
and Aharon Gedanken<sup>\*‡</sup>*

<sup>†</sup>Materials Research Centre, Indian Institute of Science, Bangalore, 560012, India

<sup>‡</sup>Bar-Ilan Institute for Nanotechnology and Advanced Materials, Department of Chemistry, Bar-Ilan University, Ramat-Gan, 5290002, Israel

<sup>§</sup>Present address: Bar-Ilan Institute for Nanotechnology and Advanced Materials, Department of Chemistry, Bar-Ilan University, Ramat-Gan, 5290002, Israel

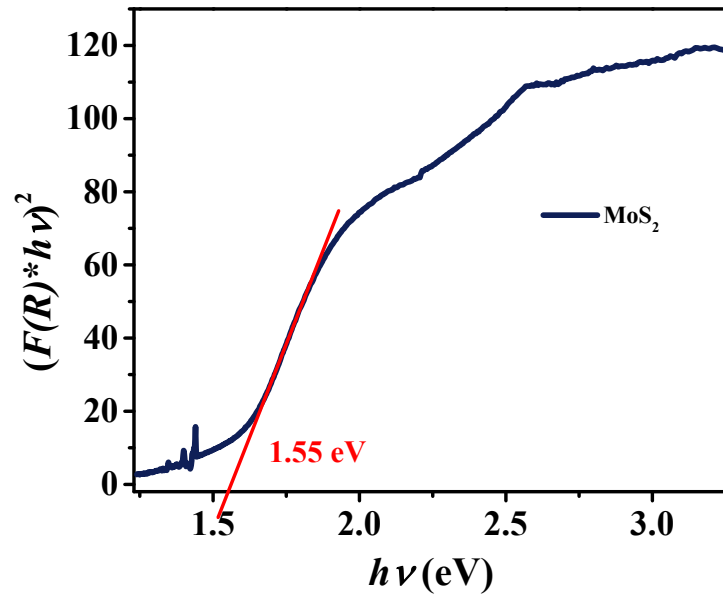

Figure S1. Bandgap of MoS<sub>2</sub> NFs.

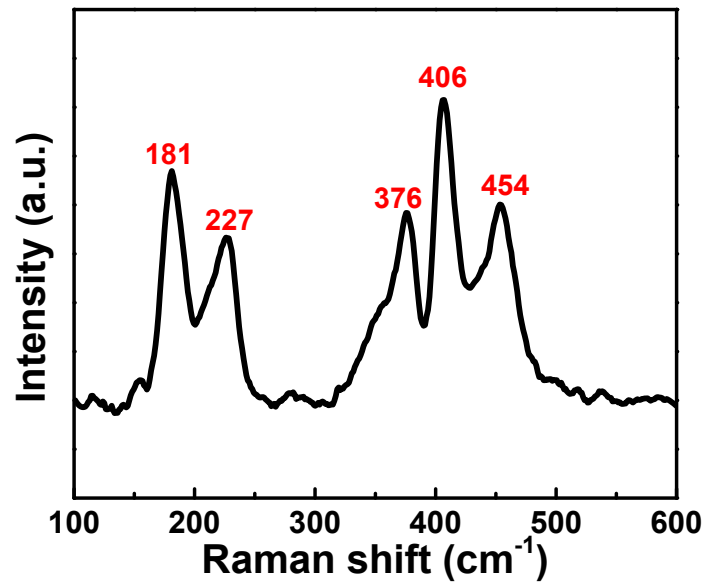

Figure S2. Raman spectrum of MoS<sub>2</sub> NFs.

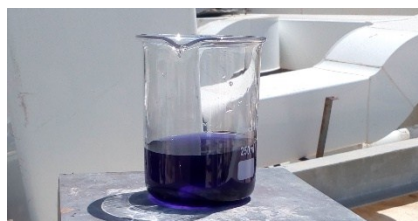

Figure S3. Simple equipment for dye degradation under natural sunlight.

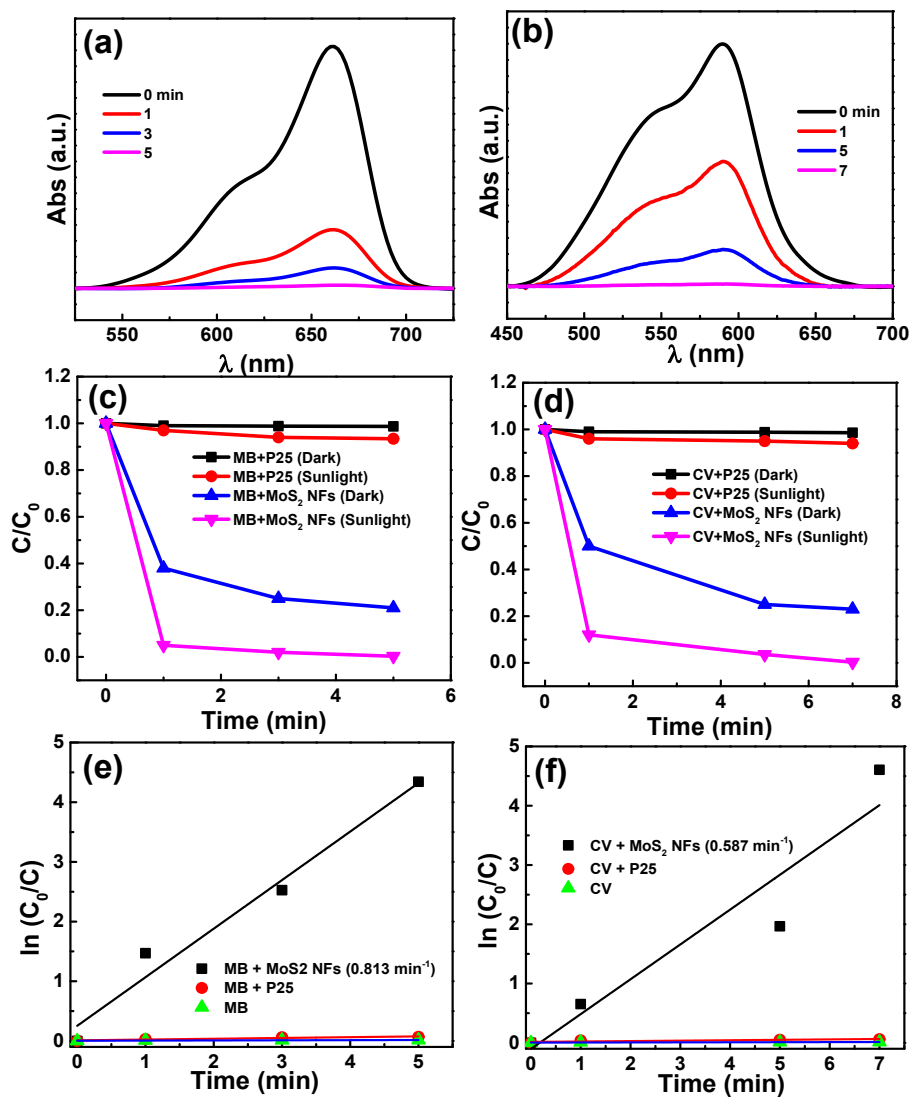

**Figure S4.** (a and b) UV-Visible spectra of 40  $\mu\text{M}$  MB and CV in  $\text{MoS}_2$  NFs under sun light. (c and d) Photodegradation rate of MB and CV in  $\text{MoS}_2$  NFs in dark and sun light. (e and f) Plots of  $\ln(C_0/C)$  versus irradiation time of MB and CV and the straight line should be considered as guide to the eye.

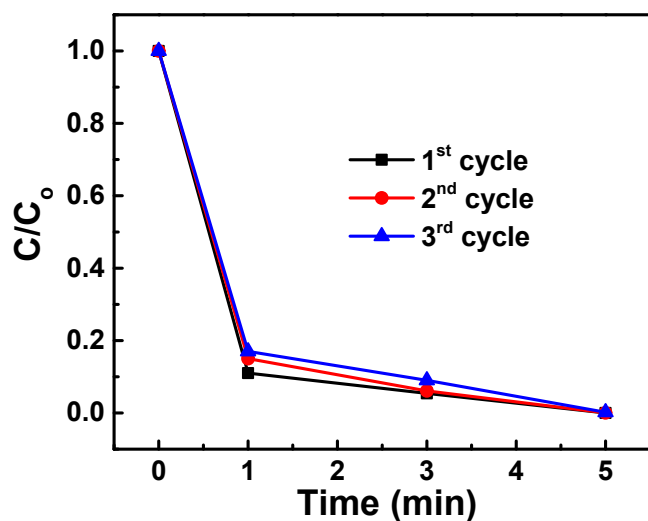

**Figure S5.** Repeatability tests for the degradation of 40  $\mu\text{M}$  MB with  $\text{MoS}_2$  NFs under solar light.

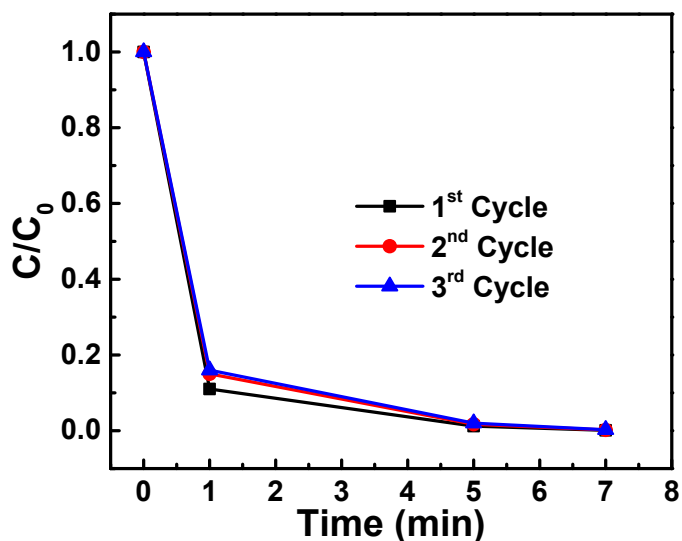

**Figure S6.** Repeatability tests for the degradation of 40  $\mu\text{M}$  of CV with  $\text{MoS}_2$  NFs under solar light.

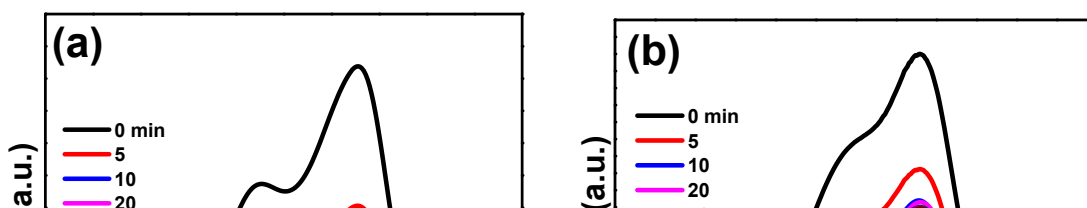

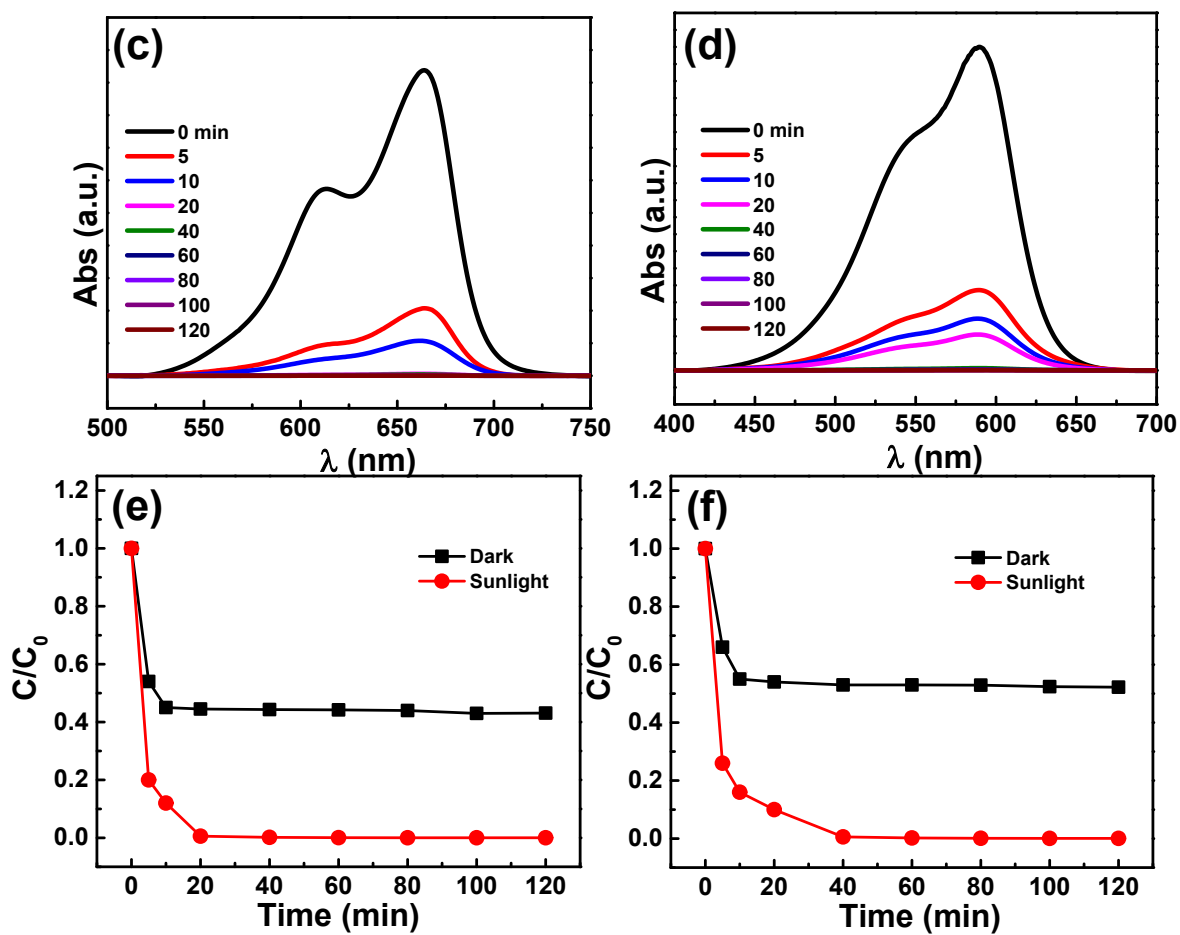

**Figure S7.** (a & b and c & d) UV-visible spectra of 100  $\mu$ M MB & CV in MoS<sub>2</sub> NFs under dark and natural sun light. (e and f) Degradation profiles of MB and CV in dark and sun light.

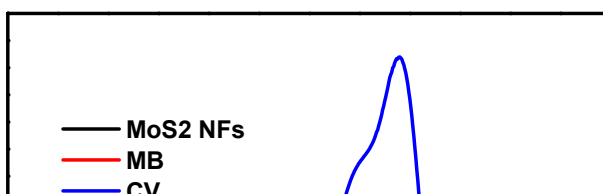

**Figure S8.** UV-Vis spectra of MB and CV before and after photocatalysis.
